# Supplementary material for: Investigating relationships between nitrogen inputs and in-stream nitrogen concentrations and exports across catchments in Victoria, Australia
Source: Copernicus journal article supplement (doi:10.5194/bg-22-7647-2025), 2025-12-05
Supplement: Supplementary file 2 [file Table_S1_Catchment_Information_and_Nitrogen_Input_Data.xlsx]

## Sheet: Sheet1
Sites	Sites name	Latitude	Longitude	Catchment Area (km²)	Land Use ( % of Catchment Area)									Catchment Characteristics						Total Nitrogen Inputs and Outputs											CMA	Region
					Forests (%)	Water (%)	Intensive Uses (%)	Cropping (%)	Dairy (%)	Horticulture (%)	Mixed Farming and Grazing (%)	Non-Dairy (%)	Agricultural Land Use (%)	Area Normalized Streamflow (mm yr⁻¹)	Annual Temperature (°C)	Catchment Slope (°)	Mean Annual Rainfall (mm yr⁻¹)	Runoff pereniality (°)	Stream Density	Fertiser nitrogen Input (kg ha⁻¹)	Purchased Feed Non Dairy (kg ha⁻¹)	Purchased Feed Dairy (kg ha⁻¹)	Total purchase feed (kg ha⁻¹)	Human food nitrogen (kg ha⁻¹)	Total N Fixation (kg ha⁻¹)	Total nitrogen Input (kg ha⁻¹)	TN Concentration (mg L⁻¹)	Nox:TN Ratio	Riverine Export (kg ha⁻¹)	Riverine Export (% of Inputs)
235237	SCOTTS CREEK @ CURDIE (DIGNEYS BRIDGE)	-38.448	142.989	346.12	11.1152	0	4.6662	0	58.2184	0	25.5099	0.490301	84.2186	183.704	12.729	9.75148	937.77	0.34	0.804847	120.074	0.585004	33.9995	34.5845	0.164564	29	183.823	2.39182	0.2	8.74978	4.75988	Corangamite	South-West
235203	CURDIES RIVER @ CURDIE	-38.445	142.96	790.328	9.04478	0.0372491	6.13645	0	52.605	0.0005542	31.8662	0.309779	84.7815	126.861	12.716	3.33214	883.715	0.33	0.717684	106.305	0.72396	30.7213	31.4453	0.311449	29	167.061	1.75736	0.2	5.10016	3.05286	Glenelg Hopkins	South-West
234203	PIRRON YALLOCK CREEK @ PIRRON YALLOCK (ABOVE H'WY BR.)	-38.354	143.419	169.399	12.2735	0.00641681	8.87716	0	40.6988	0	17.0715	21.0727	78.8429	89.1177	12.533	9.75361	824.973	0.39	0.419261	80.8153	0.858244	23.7681	24.6263	0.128731	34	139.57	2.41273	0.1	3.19309	2.2878	Corangamite	South-West
235211	KENNEDYS CREEK @ KENNEDYS CREEK	-38.589	143.256	268.31	40.5438	0	3.72527	0	32.554	0	16.2177	6.9593	55.7309	154.666	12.525	9.47759	954.033	0.58	0.854262	69.6608	0.521482	19.0115	19.533	0.0955124	29	118.289	1.73455	0.3	4.4505	3.76238	Corangamite	South-West
235224	GELLIBRAND RIVER @ BURRUPA	-38.702	143.248	1043.77	63.7172	0.00352761	4.85752	0	14.5518	0.126687	10.9447	5.79854	31.4218	233.991	12.246	6.88303	1090.16	2.37	0.852877	35.022	0.376724	8.49825	8.87497	0.069266	29	72.9662	0.902636	0.3	3.3647	4.61131	Corangamite	South-West
237200	MOYNE RIVER @ TOOLONG	-38.32	142.226	592.086	0.681799	0	2.96255	0	10.6856	0	85.67	0	96.3557	73.3415	12.947	12.8761	737.356	0.06	0.581722	33.6242	1.92758	6.24042	8.16799	0.0537843	29	70.8459	1.13173	0.1	2.01145	2.83919	Glenelg Hopkins	South-West
227200	TARRA RIVER @ YARRAM	-38.551	146.683	224.663	58.4928	0.0174217	8.4288	0	12.6366	0	20.4244	0	33.061	131.667	12.708	13.7265	964.358	6.89	0.749798	28.2538	0.412573	10.7411	11.1537	0.126334	29	68.5338	1.119	0.5	4.1891	6.11246	West gippsland	Gippsland
233224	BARWON RIVER @ RICKETTS MARSH	-38.325	143.834	580.249	46.1977	0.101429	8.00264	0.580091	10.3318	1.04279	14.4728	19.2707	45.6982	94.103	12.15	8.42742	944.274	2.73	0.884921	27.4753	0.759229	6.03377	6.793	0.162996	34	68.4313	0.838818	0.1	1.46749	2.14448	Corangamite	South-West
233218	BARWON RIVER @ INVERLEIGH	-38.149	143.99	1695.2	19.4897	1.46395	9.81421	5.35755	5.93843	0.456414	29.0389	28.4409	69.2322	40.5057	12.623	14.5787	799.551	2.37	0.692476	33.3854	1.29329	3.46805	4.76134	0.16563	22	60.3124	1.03445	0.1	0.854678	1.41708	Corangamite	South-West
227211	AGNES RIVER @ TOORA	-38.64	146.373	66.0537	52.4614	0	8.91374	0	9.3444	0	26.279	3.00144	38.6249	375.607	12.319	6.28148	1189.95	5.07	0.78888	25.6637	0.591465	7.94274	8.53421	0.0659152	17	51.2638	1.37327	0.4	7.3644	14.3657	West gippsland	Gippsland
235234	LOVE CREEK @ GELLIBRAND	-38.483	143.572	75.4579	67.8203	0	7.73782	0	10.4308	0	6.35347	7.65756	24.4419	93.5172	12.144	8.01863	999.927	1.17	0.796147	25.1015	0.315248	6.0916	6.40685	0.109358	17	48.6177	0.937727	0.2	1.43399	2.94952	Corangamite	South-West
402222	KIEWA RIVER @ KIEWA (MAIN STREAM)	-36.254	147.02	1151.83	64.7874	0.0450771	6.05978	0.171179	9.59446	0.185073	4.9991	14.1579	29.1077	470.796	10.914	9.02846	1414.6	7.57	0.87423	26.7626	0.431033	10.6403	11.0713	0.187549	10	48.0215	0.356818	0.2	2.15513	4.48784	North East	North
403223	KING RIVER @ DOCKER ROAD BRIDGE	-36.516	146.389	1080.57	65.8784	0	5.06084	0.111854	1.06828	4.4062	20.2324	3.24205	29.0608	273.845	11.639	2.78237	1207.03	4.58	0.872055	24.1095	0.528175	1.18472	1.7129	0.0611495	17	42.8835	0.347818	0.3	1.416	3.30196	North East	North
403213	FIFTEEN MILE CREEK @ GRETA SOUTH	-36.619	146.244	225.24	65.3288	0	4.20323	0	0	5.07298	20.5326	4.86235	30.4679	183.133	12.039	4.35422	1077	3.04	0.68074	22.9927	0.571386	0	0.571386	0.0517436	17	40.6158	0.378364	0.3	1.26609	3.11724	Goulbourn Broken	North
402205	KIEWA RIVER @ BANDIANA	-36.138	146.954	1668.23	55.6801	0.0316856	9.69732	0.11819	7.24673	0.175713	6.40017	20.6501	34.5909	335.371	11.55	0.743138	1267.97	6.5	0.888265	22.6242	0.546415	6.15972	6.70614	0.308596	10	39.639	0.338909	0.2	1.52142	3.83819	East Gippsland	Gippsland
237207	SURRY RIVER @ HEATHMERE	-38.243	141.663	294.341	54.7955	0	6.76968	0	3.87446	0	19.9178	14.6426	38.4348	102.389	13.022	4.12797	829.821	0.28	0.318765	12.2432	0.777609	2.26268	3.04029	0.0920192	22	37.3755	0.458182	0.1	1.24515	3.33147	Glenelg Hopkins	South-West
238228	WANNON RIVER @ HENTY	-37.645	141.506	4083.66	19.2121	0.0337406	5.24423	0.18263	0.200442	0.0248339	73.6192	1.4828	75.51	34.059	12.67	2.27818	687.2	0.22	0.603905	16.0738	1.6898	0.117058	1.80685	0.190842	17	35.0714	1.34964	0.1	0.870511	2.48211	Wimmera	South-West
403241	OVENS RIVER @ PEECHELBA	-36.163	146.236	6265.17	60.5747	0.0354942	7.56246	0.378488	0.904939	1.82615	21.8685	6.84929	31.8273	230.943	12.149	7.31149	1128	4.47	0.795678	15.6873	0.64615	1.00358	1.64973	0.317655	17	34.6547	0.375455	0.3	1.22746	3.54196	North East	North
415207	WIMMERA RIVER @ EVERSLEY	-37.185	143.185	306.671	45.0566	0.0104379	7.17104	0.3966	0	2.13397	44.4563	0.775084	47.7619	24.6977	12.04	6.17932	712.535	0.65	0.684542	14.6947	1.01771	0	1.01771	0.0347536	17	32.7472	1.12618	0	0.499794	1.52622	Glenelg Hopkins	South-West
404207	HOLLAND CREEK @ KELFEERA	-36.611	146.059	457.622	52.3908	0.00242558	7.95737	0	1.33324	0.0250534	36.8644	1.42669	39.6494	123.814	12.402	9.72725	974.046	2.76	0.708697	12.4867	0.86155	1.47856	2.34011	0.0743841	17	31.9012	0.710182	0.2	1.50445	4.71597	Goulbourn Broken	North
238202	GLENELG RIVER @ SANDFORD	-37.619	141.429	9140.97	30.1602	1.04378	4.42243	0.573656	0.324158	0.0110943	60.3234	3.14125	64.3736	29.0073	12.838	2.4588	674.724	0.2	0.640598	12.7305	1.42796	0.189308	1.61726	0.107385	17	31.4552	1.23055	0.1	0.712045	2.26368	Wimmera	South-West
238206	GLENELG RIVER @ DARTMOOR	-37.925	141.281	11230.3	35.2856	0.849919	4.28264	0.466932	0.422864	0.0114963	54.2402	4.4404	59.5819	31.3637	12.885	4.93458	687.249	0.16	0.59	11.8068	1.32031	0.246952	1.56727	0.0922432	17	30.4663	1.47273	0.4	0.725795	2.38229	Glenelg Hopkins	South-West
238223	WANDO RIVER @ WANDO VALE	-37.496	141.426	177.256	22.3498	0	3.07254	0	0	0	68.9636	5.614	74.5776	64.3167	12.619	3.7811	692.33	0.02	0.7664	11.4275	1.678	0	1.678	0.0288635	17	30.1343	1.13809	0.1	1.52994	5.07707	Glenelg Hopkins	South-West
235227	GELLIBRAND RIVER @ BUNKERS HILL	-38.524	143.483	314.074	73.2209	0	7.45206	0	6.34475	0.272993	5.8396	6.86966	19.327	296.217	11.839	6.25289	1159.56	3.52	0.810145	20.0139	0.285958	3.70533	3.99129	0.0843619	5	29.0895	0.61	0.4	2.98883	10.2746	Corangamite	South-West
405251	BRANKEET CREEK @ ANCONA	-36.969	145.785	117.917	48.2833	0	5.78408	0	0	0.328833	44.2919	1.31189	45.9327	78.9539	11.74	0.920372	961.536	2.82	0.691656	9.6443	1.02609	0	1.02609	0.0296659	17	27.7001	0.761273	0.3	0.902731	3.25895	Goulbourn Broken	North
405209	ACHERON RIVER @ TAGGERTY	-37.318	145.713	627.762	81.1745	0	5.41965	0	0	0.929715	12.3986	0.0775628	13.4059	426.043	10.855	1.84274	1446.24	5.98	1.02763	6.47777	0.280713	0	0.280713	0.101096	17	23.8596	0.374545	0.4	1.87532	7.85984	Goulbourn Broken	North
225201	AVON RIVER @ STRATFORD	-37.969	147.076	1470.12	79.6036	0.00180869	4.63382	0	1.75019	0.0113548	13.7927	0.206527	15.7608	109.622	11.911	13.3845	811.371	8.76	0.792555	4.97051	0.282784	1.48766	1.77045	0.0905348	17	23.8315	0.386273	0.3	1.17695	4.93861	East Gippsland	Gippsland
403217	ROSE RIVER @ MATONG NORTH	-36.821	146.582	180.408	77.3962	0	0.834526	0	0	0	21.7693	0	21.7693	289.374	11.239	7.87374	1327.39	4.24	0.839215	6.04787	0.489809	0	0.489809	0.00299466	17	23.5407	0.304	0.4	1.0528	4.47224	North East	North
405203	GOULBURN RIVER @ EILDON	-37.247	145.889	3950.22	70.1668	2.09393	7.12837	0.0841532	0	0.0652601	20.2606	0.200855	20.6109	294.223	10.769	9.57507	1210.42	5.02	0.885746	5.98156	0.413321	0	0.413321	0.109899	17	23.5048	0.265455	0.4	0.793714	3.37682	West gippsland	Gippsland
401215	MORASS CREEK @ UPLANDS	-36.866	147.703	537.236	49.9584	0	3.46349	0	0	0	3.82979	42.7483	46.5781	57.6439	9.376	2.0983	976.472	8.04	0.750149	7.0897	1.04801	0	1.04801	0.0136378	10	18.1513	0.847273	0	0.585603	3.22622	North East	North
402203	KIEWA RIVER @ MONGANS BRIDGE	-36.595	147.1	556.576	80.2082	0.0932865	6.67671	0.315975	2.02649	0.298353	4.15253	6.2285	13.0218	859.956	9.3	2.57019	1686.03	9.91	0.922246	10.1441	0.209697	1.72252	1.93222	0.245194	5	17.3215	0.232727	0.3	2.43658	14.0668	East Gippsland	Gippsland
223214	TAMBO RIVER @ U/S OF SMITH CREEK	-36.955	147.928	31.6795	64.0258	0	1.25302	0	0	0	4.15392	30.5673	34.7212	57.8097	8.49	10.7422	1023.21	7.74	0.973721	5.76147	0.781228	0	0.781228	0.000314482	10	16.543	0.394545	0.1	0.319297	1.9301	North East	North
401226	VICTORIA RIVER @ VICTORIA FALLS	-37.088	147.458	177.863	69.241	0	3.2389	0	0	0.024339	1.80544	25.6903	27.5201	132.302	7.975	10.2282	1191.31	9.89	0.82039	5.4155	0.618655	0	0.618655	0.0204968	10	16.0546	0.324	0.1	0.595252	3.70766	North East	North
401203	MITTA MITTA RIVER @ HINNOMUNJIE	-36.946	147.606	1527.54	70.547	0.000684762	4.04802	0	0	0.411367	2.98753	22.0054	25.4043	283.831	8.647	12.9604	1180.38	10.28	0.807398	5.04765	0.504857	0	0.504857	0.024672	10	15.5772	0.185455	0.1	0.606881	3.89596	East Gippsland	Gippsland
401204	MITTA MITTA RIVER @ TALLANDOON	-36.408	147.231	4749.65	80.0057	0.0717872	2.5472	0	0.621237	0.1323	1.64513	14.9766	17.3753	226.183	9.814	5.76627	1198.38	7.5	0.769436	4.58469	0.33576	0.528052	0.863811	0.0152881	10	15.4638	0.270636	0.3	0.57021	3.68739	East Gippsland	Gippsland
223202	TAMBO RIVER @ SWIFTS CREEK	-37.269	147.729	899.29	70.3219	0	2.32901	0	0	0.288896	3.92984	23.1304	27.3491	70.5625	9.966	14.5904	822.282	9.74	0.809919	4.0967	0.546616	0	0.546616	0.0212773	10	14.6646	0.298636	0.1	0.803401	5.47851	East Gippsland	Gippsland
403230	OVENS RIVER @ ROCKY POINT	-36.533	146.668	2969.97	85.0225	0.0618962	4.00119	0.635459	0.471788	0.616612	3.9117	5.27888	10.9144	339.824	11.135	0.448998	1350.82	5.24	0.778697	8.3985	0.18565	0.40102	0.586669	0.148193	5	14.1334	0.306091	0.4	1.23042	8.70579	East Gippsland	Gippsland
401211	MITTA MITTA RIVER @ COLEMANS	-36.531	147.457	3664.09	78.3439	0.0929529	2.57139	0	0	0.171496	1.95976	16.8605	18.9918	211.656	9.367	10.414	1167.46	8.46	0.771802	3.50086	0.38017	0	0.38017	0.0140046	10	13.895	0.217	0.2	0.446313	3.21203	East Gippsland	Gippsland
403210	OVENS RIVER @ MYRTLEFORD	-36.571	146.718	1149.24	89.4616	0	5.39761	0.423123	0.158415	0.873706	1.89257	1.79301	5.14082	417.026	10.766	0.735611	1431.36	6.07	0.762681	7.67215	0.0744487	0.134653	0.209101	0.200554	5	13.0818	0.238091	0.4	1.14071	8.71984	East Gippsland	Gippsland
403205	OVENS RIVER @ BRIGHT	-36.726	146.953	493.572	91.8257	0	5.75377	0.0510482	0	0.518098	1.04911	0.802302	2.42056	407.953	10.491	7.77131	1494.02	6.53	0.809223	4.97177	0.0373986	0	0.0373986	0.291588	5	10.3008	0.201727	0.3	1.07403	10.4267	East Gippsland	Gippsland
226226	TANJIL RIVER @ TANJIL JUNCTION	-37.98	146.193	297.505	90.1059	0	3.25336	0	0.152576	0.0911683	2.38329	4.01369	6.64073	432.487	10.298	16.1045	1388.54	9.14	0.92605	2.19272	0.129219	0.129689	0.258908	0.0173175	5	7.46895	0.435	0.5	2.72332	36.4619	Melbourne water	Gippsland
221211	COMBIENBAR RIVER @ COMBIENBAR	-37.44	148.983	178.539	92.0626	0	1.80324	0	0	0	3.41516	2.71897	6.13413	212.939	11.199	18.8082	1098.22	14.38	0.916113	2.2873	0.123909	0	0.123909	0.00650572	5	7.41771	0.528818	0.5	1.91303	25.79	East Gippsland	Gippsland
224213	DARGO RIVER @ LOWER DARGO ROAD	-37.495	147.269	667.862	88.7334	0	3.0175	0	0	0	8.06931	0.179808	8.24912	269.708	9.47	7.82114	1095.89	9.63	0.769249	1.62849	0.166632	0	0.166632	0.0186515	5	6.81377	0.211727	0.2	1.00475	14.7459	East Gippsland	Gippsland
221212	BEMM RIVER @ PRINCES HIGHWAY	-37.607	148.902	730.674	95.3692	0	1.44609	0	0	0	1.85802	1.32673	3.18475	284.072	11.477	12.0419	1162.27	14.26	0.907267	1.04873	0.0643319	0	0.0643319	0.00203051	5	6.11509	0.538727	0.5	2.48584	40.6509	East Gippsland	Gippsland
401216	BIG RIVER @ JOKERS CREEK	-36.933	147.472	357.478	94.3268	0	1.68027	0	0	0	0.065453	3.9275	3.99295	634.048	7.953	9.33654	1603.01	10.91	0.846205	0.796282	0.0898415	0	0.0898415	0.00363011	5	5.88975	0.124364	0.1	0.958295	16.2705	North East	North
224203	MITCHELL RIVER @ GLENALADALE	-37.764	147.375	3922.95	94.5787	5.60803e-06	1.1062	0	0	0.00422208	3.55035	0.760519	4.31509	200.606	10.219	13.4252	1056.19	8.84	0.817352	0.786856	0.0870795	0	0.0870795	0.00431991	5	5.87826	0.229636	0.1	0.742224	12.6266	West gippsland	Gippsland
221201	CANN RIVER (WEST BRANCH) @ WEERAGUA	-37.373	149.199	315.586	96.7756	0	0.397946	0	0	0	0.0593088	2.76718	2.82649	159.695	10.69	18.6083	1049.46	15.43	0.802842	0.44558	0.0570951	0	0.0570951	0.000351545	5	5.50303	0.376182	0.3	1.10994	20.1696	East Gippsland	Gippsland
221208	WINGAN RIVER @ WINGAN INLET NATIONAL PARK	-37.689	149.492	420.683	96.8775	0	0.681485	0	0	0	2.16358	0.27742	2.441	180.302	13.392	6.48679	1064.21	17.32	0.863543	0.41654	0.0493082	0	0.0493082	0.000346856	5	5.4662	0.421455	0.1	1.38259	25.2934	East Gippsland	Gippsland
233214	BARWON RIVER EAST BRANCH @ FORREST	-38.529	143.73	15.7758	97.5069	0	1.02442	0	0	0	1.46871	0	1.46871	396.949	11.55	10	1137.98	4.05	0.854332	0.262208	0.0330459	0	0.0330459	0.00332502	5	5.29858	0.333727	0.3	2.65799	50.1642	Corangamite	South-West
224206	WONNANGATTA RIVER @ CROOKED RIVER	-37.408	147.089	1103.76	99.3073	0	0.108056	0	0	0	0.584646	0	0.584646	280.233	9.449	5.67	1233.3	8.44	0.854983	0.0935028	0.0118098	0	0.0118098	5.67178e-05	5	5.10537	0.133273	0.1	0.648897	12.7101	West gippsland	Gippsland
405264	BIG RIVER @ D/S OF FRENCHMAN CREEK JUNCTION	-37.519	146.076	332.037	99.1443	0	0.480787	0	0	0	0.374908	0	0.374908	505.28	9.421	9.08214	1591.85	6.59	0.849344	0.0842305	0.00757313	0	0.00757313	0.00954174	5	5.10135	0.295455	0.4	1.83599	35.9903	West gippsland	Gippsland
403244	OVENS RIVER @ HARRIETVILLE	-36.884	147.062	121.496	95.5178	0	4.48222	0	0	0	0	0	0	635.246	9.223	0.837658	1541.43	8.35	0.820863	0	0	0	0	0.0655003	5	5.0655	0.1091	0.3	0.758153	14.967	East Gippsland	Gippsland
238231	GLENELG RIVER @ BIG CORD	-37.312	142.367	58.577	99.7557	0	0	0	0	0	0.244311	0	0.244311	126.908	11.855	12.5438	815.856	0.9	0.646592	0.0235052	0.005497	0	0.005497	0.00102656	5	5.03003	0.307636	0	0.420431	8.35841	Glenelg Hopkins	South-West
405219	GOULBURN RIVER @ DOHERTYS	-37.331	146.131	701.903	99.4496	0	0.546778	0	0	0	0.00359879	0	0.00359879	455.542	9.753	5.38373	1416.83	6.01	0.876022	0.000662968	7.26955e-05	0	7.26955e-05	0.0105527	5	5.01129	0.151091	0.3	0.916786	18.2944	West gippsland	Gippsland
402223	KIEWA RIVER WEST BRANCH @ U/S OF OFFTAKE	-36.791	147.16	100.727	97.0093	0	2.9907	0	0	0	0	0	0	1117.42	7.644	5.59751	1821.55	11.23	0.788669	0	0	0	0	0.00500693	5	5.00501	0.114582	0.2	1.55355	31.04	North East	North
405205	MURRINDINDI RIVER @ MURRINDINDI ABOVE COLWELLS	-37.414	145.564	107.258	99.982	0	0.0179661	0	0	0	0	0	0	399.949	10.573	11.3108	1514.13	7.01	0.843288	0	0	0	0	0.00442775	5	5.00443	0.457273	0.4	2.04584	40.8805	Goulbourn Broken	North
401212	NARIEL CREEK @ UPPER NARIEL	-36.445	147.829	255.531	99.6662	0	0.33385	0	0	0	0	0	0	537.858	8.912	3.35423	1384.02	7.68	0.820704	0	0	0	0	0.000651284	5	5.00065	0.140727	0.2	0.76653	15.3286	North East	North
222217	RODGER RIVER @ JACKSONS CROSSING	-37.41	148.36	433.309	100	0	0	0	0	0	0	0	0	196.954	11.038	4.33	997.005	12.85	0.773836	0	0	0	0	0.000154257	5	5.00015	0.459455	0.4	2.0119	40.2368	East Gippsland	Gippsland
223204	NICHOLSON RIVER @ DEPTFORD	-37.593	147.697	288.922	99.5415	0	0.458477	0	0	0	0	0	0	130.689	11.454	1.77879	825.646	9.4	0.816912	0	0	0	0	0.000121099	5	5.00012	0.397182	0.3	0.963234	19.2642	East Gippsland	Gippsland
