# Supplementary material for: Investigating relationships between nitrogen inputs and in-stream nitrogen concentrations and exports across catchments in Victoria, Australia
Source: Copernicus journal article supplement (doi:10.5194/bg-22-7647-2025), 2025-12-05
Supplement: Supplementary file [file bg-22-7647-2025-supplement-title-page.pdf › bg-22-7647-2025-supplement-title-page.pdf]

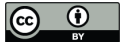

*Supplement of*

**Investigating relationships between nitrogen inputs and in-stream nitrogen concentrations and exports across catchments in Victoria, Australia**

**Olaleye Babatunde et al.**

*Correspondence to:* Olaleye Babatunde (olaleyejohn.babatunde.1@unimelb.edu.au)

- bg-22-7647-2025-supplement-title-page.pdf
- Supplementary\_ Tables\_and\_Figures\_egusphere-2025-2456.docx
- Table\_S1\_Catchment\_Information\_and\_Nitrogen\_Input\_Data.xlsx

The copyright of individual parts of the supplement might differ from the article licence.
